# Supplementary material for: F−@d4r, a New Type of Acidic Catalytic Site in Zeolite
Source: MDPI journal article supplement (doi:10.3390/catal12080809), 2022-07-24
Supplement: s1 [file s1]

## Electronic Supplementary Information

# F<sup>-</sup>@d4r, a New Type of Acidic Catalytic Site in Zeolite

Yukai Zhao <sup>1,†</sup>, Weichi Liang <sup>1,†</sup>, Yihan Wang <sup>1</sup>, Yan Tong <sup>2</sup>, Zhanhong Li <sup>1</sup>, Yuqian Liang <sup>1</sup> and Xiaolong Liu <sup>2,\*</sup> and Jiuxing Jiang <sup>1,3,\*</sup>

<sup>1</sup> MOE Key Laboratory of Bioinorganic and Synthetic Chemistry, School of Chemistry,

Sun Yat-Sen University, Guangzhou 510275, China;

zhaoyk7@mail2.sysu.edu.cn (Y.Z.); liangwch3@mail2.sysu.edu.cn (W.L.);

wangyh@mail2.sysu.edu.cn (Y.W.); lizhh63@mail2.sysu.edu.cn (Z.L.);

liangyq38@mail2.sysu.edu.cn (Y.L.)

<sup>2</sup> School of Materials, Sun Yat-Sen University, Shenzhen 518107, China;

tongy9@mail2.sysu.edu.cn

<sup>3</sup> Guangdong Provincial Key Laboratory of Optical Chemicals, XinHuaYue Group, Maoming, 525000, China

\* Correspondence: liuxlong9@mail.sysu.edu.cn (X.L.);

jiangjiux@mail.sysu.edu.cn (J.J.)

† These authors contributed equally to this work.

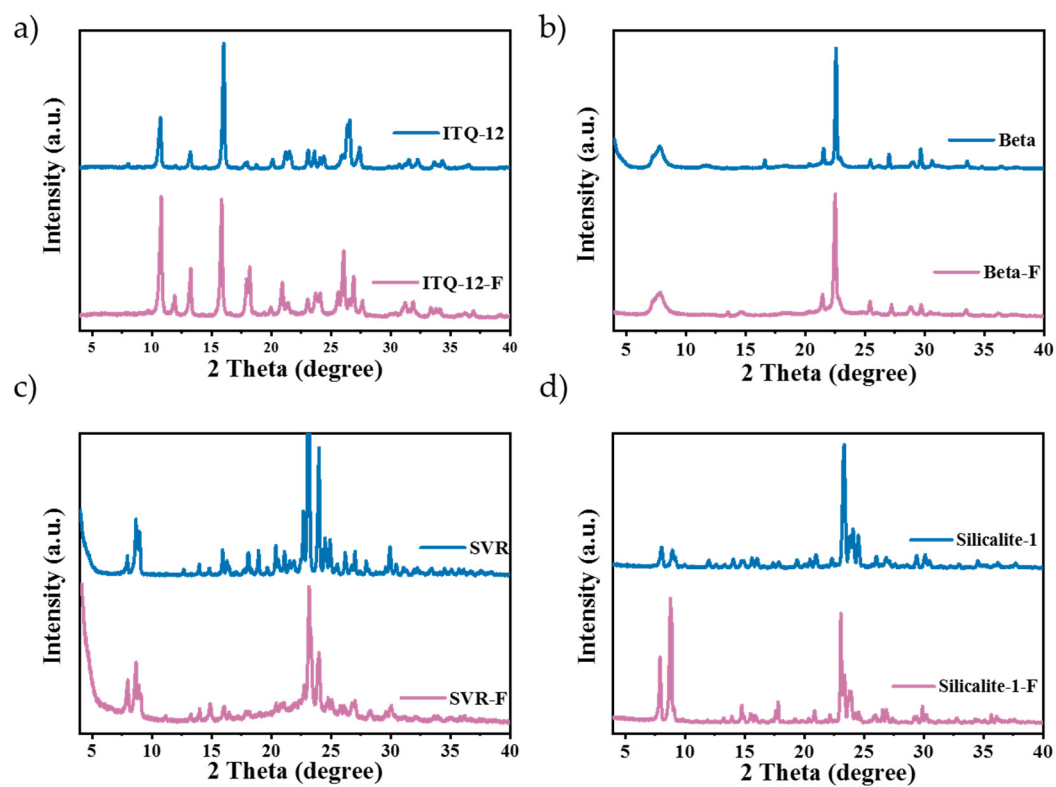

Figure S1: The XRD patterns of a) As synthesized ITQ-12 and  $F^-$  treated ITQ-12. b) As synthesized Beta and  $F^-$  treated Beta. c) As synthesized SSZ-74 and  $F^-$  treated SSZ-74. d) As synthesized Silicalite-1 and  $F^-$  treated Silicalite-1.

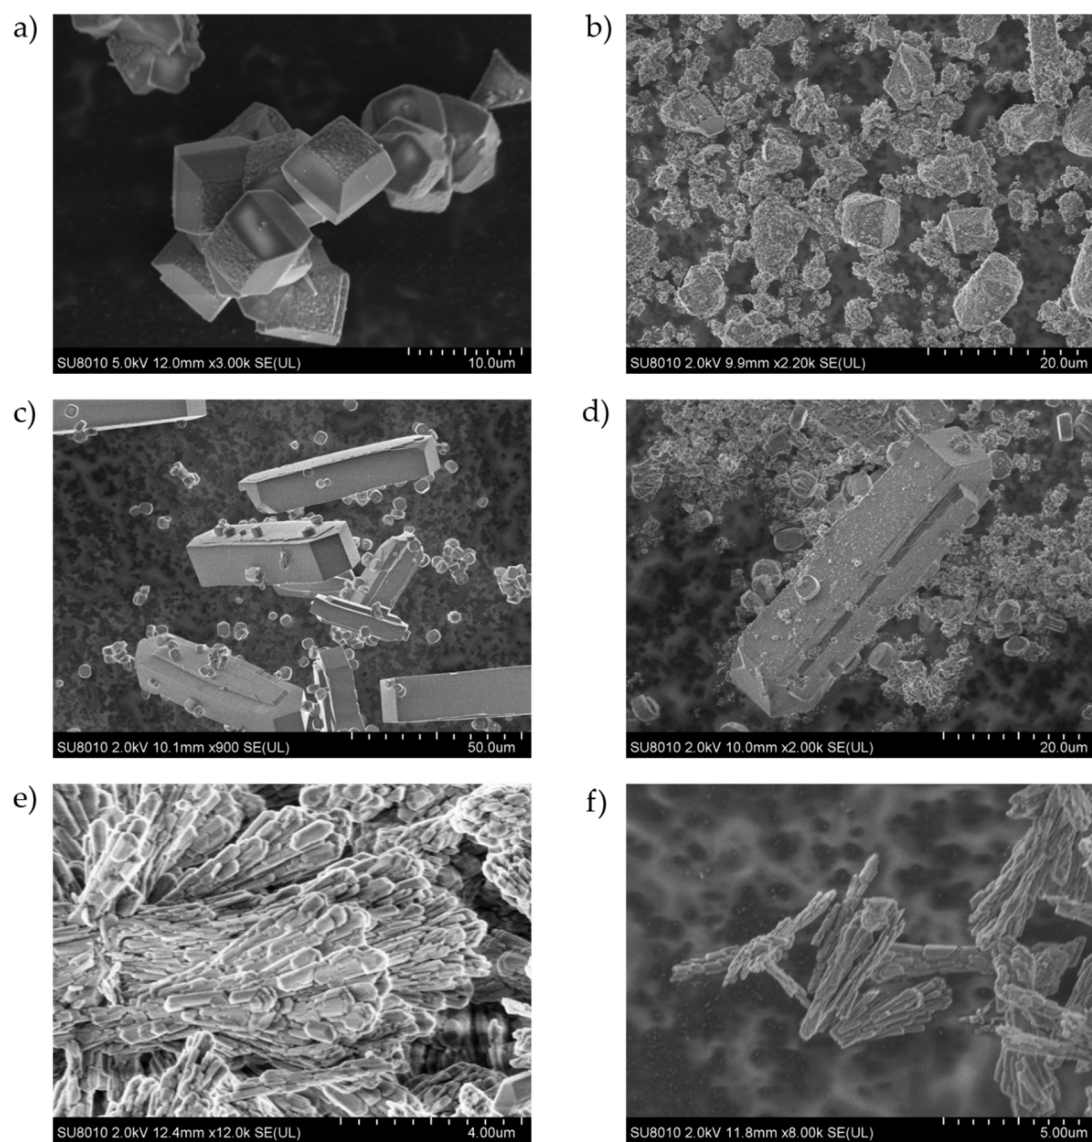

Figure S2: The SEM of a) As synthesized Beta. b)  $F^-$  treated Beta. c) SVR and  $F^-$  treated SVR. c) Silicalite-1. d)  $F^-$  treated Silicalite-1. e) As synthesized ITQ-12 f)  $F^-$  treated ITQ-12.

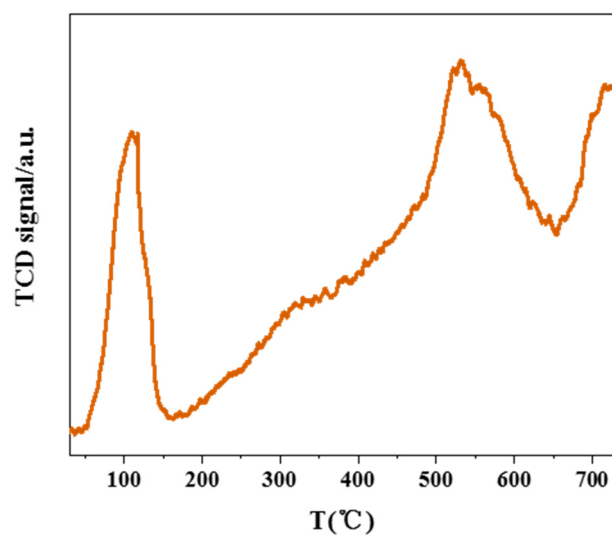

Figure S3:  $\text{NH}_3$ -TPD profile of ITQ-12-F-300.

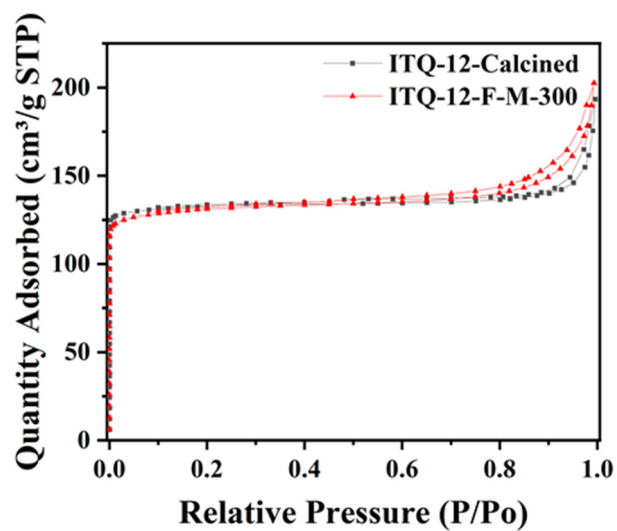

Figure S4: The  $\text{N}_2$  adsorption isotherm of ITQ-12-calcined, and ITQ-12-F-300.

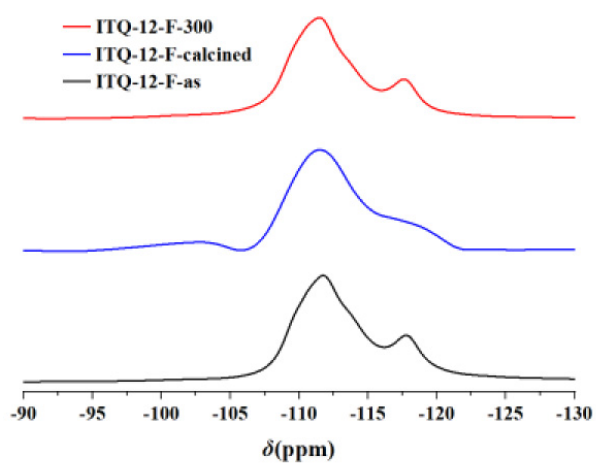

Figure S5:  $^{29}\text{Si}$ -MAS-NMR of ITQ-12-F-as, ITQ-12-F-calcined, ITQ-12-F-300.

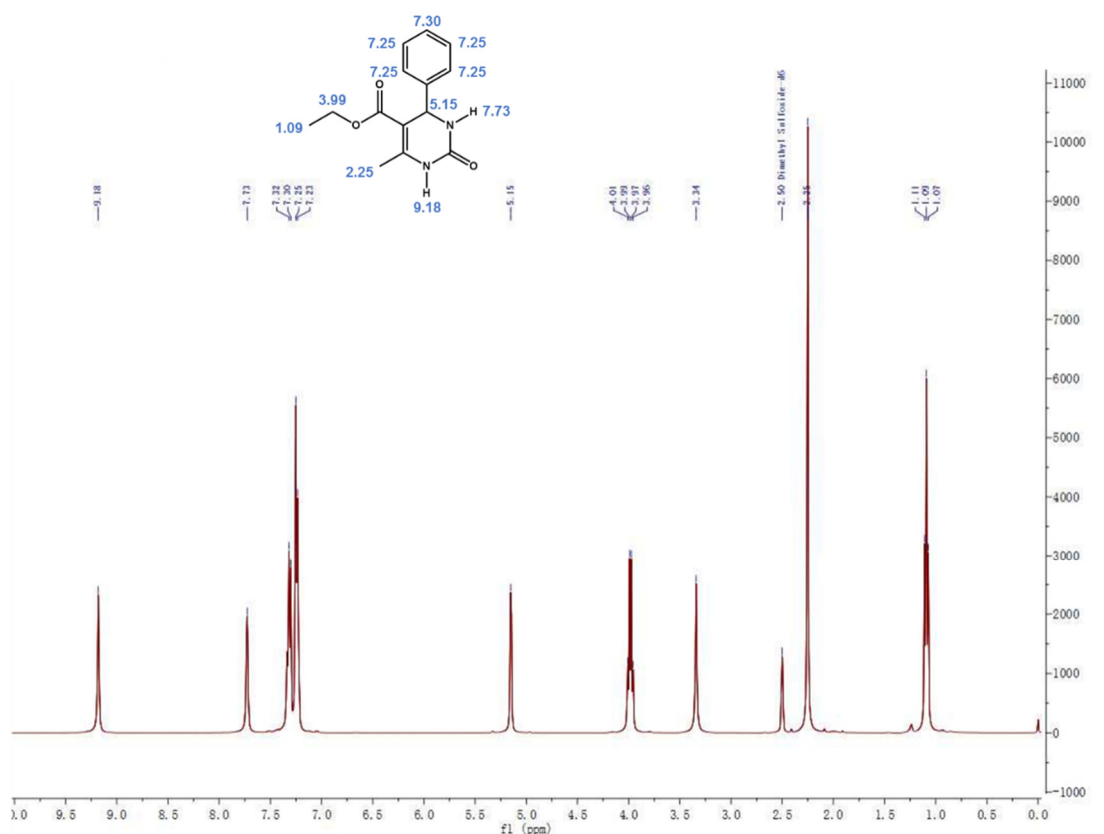

Figure.S6  $^1\text{H}$  NMR spectra of purified sample dissolved in DMSO- $d_6$  by Biginelli reaction with F@d4r catalysts.

**Table S1.** Zeta potential and Surface energy of F@d4r zeolite samples

| Sample       | Zeta potential/mV | Surface energy/(mJ·m <sup>-2</sup> ) |
|--------------|-------------------|--------------------------------------|
| ITQ-12-as    | -3.91             | 68.24                                |
| ITQ-12-F-300 | -13.55            | 66.72                                |
| ITQ-12-F-350 | -10.02            | 68.01                                |
